# Supplementary material for: Improving Preschoolers’ Arithmetic through Number Magnitude Training: The Impact of Non-Symbolic and Symbolic Training
Source: PLoS One. 2016 Nov 22;11(11):e0166685. doi: 10.1371/journal.pone.0166685 (PMC5119778; doi:10.1371/journal.pone.0166685)
Supplement: S5 Data — (XLSX) [file pone.0166685.s006.xlsx]

## Sheet: T1
Sujet	Groupe	MOY	Petits	Grands		Z-Score	MOYENNE	Ecart-type
102	1	0.210063	0.200466	0.217741		0.534838	0.170536	0.0739044
105	1	0.353107	0.351179	0.354649		2.47036	0.170536	0.0739044
110	1	0.31677	0.282333	0.34432		1.97869	0.170536	0.0739044
111	1	0.178996	0.184293	0.174759		0.114468	0.170536	0.0739044
152	1	0.169085	0.0735609	0.245504		-0.0196388	0.170536	0.0739044
155	1	0.114877	0.0449469	0.17082		-0.753132	0.170536	0.0739044
205	1	0.0648209	0.0690927	0.0614035		-1.43044	0.170536	0.0739044
206	1	0.098605	0.058443	0.130735		-0.973303	0.170536	0.0739044
207	1	0.121254	0.0682018	0.163695		-0.666845	0.170536	0.0739044
212	1	0.113755	0.0800027	0.140757		-0.768311	0.170536	0.0739044
214	1	0.108661	0.043831	0.160525		-0.837233	0.170536	0.0739044
216	1	0.131002	0.106483	0.150617		-0.534942	0.170536	0.0739044
219	1	0.146747	0.0877467	0.193947		-0.321893	0.170536	0.0739044
224	1	0.127297	0.0790718	0.165878		-0.585067	0.170536	0.0739044
226	1	0.200716	0.14605	0.244449		0.408363	0.170536	0.0739044
228	1	0.138371	0.107429	0.163125		-0.435229	0.170536	0.0739044
229	1	0.211062	0.276439	0.158761		0.548356	0.170536	0.0739044
230	1	0.240241	0.291721	0.199057		0.943175	0.170536	0.0739044
254	1	0.194761	0.0826754	0.28443		0.327785	0.170536	0.0739044
103	2	0.182677	0.183388	0.182107		-0.0445422	0.185649	0.0667237
104	2	0.138523	0.0641721	0.198004		-0.706275	0.185649	0.0667237
108	2	0.357225	0.403399	0.320285		2.57144	0.185649	0.0667237
151	2	0.192184	0.07108	0.289068		0.0979528	0.185649	0.0667237
153	2	0.294548	0.452316	0.168333		1.63209	0.185649	0.0667237
154	2	0.213463	0.218404	0.209509		0.416852	0.185649	0.0667237
201	2	0.184045	0.134153	0.223959		-0.0240291	0.185649	0.0667237
202	2	0.196637	0.143613	0.239057		0.16469	0.185649	0.0667237
203	2	0.138682	0.128427	0.146886		-0.703901	0.185649	0.0667237
210	2	0.1202	0.116598	0.123081		-0.980894	0.185649	0.0667237
213	2	0.110922	0.0466831	0.162314		-1.11994	0.185649	0.0667237
220	2	0.120699	0.1044	0.133739		-0.973407	0.185649	0.0667237
221	2	0.210545	0.174342	0.239507		0.373122	0.185649	0.0667237
225	2	0.233967	0.26446	0.209572		0.724153	0.185649	0.0667237
231	2	0.192958	0.121299	0.250285		0.109547	0.185649	0.0667237
251	2	0.0998904	0.072807	0.121557		-1.28527	0.185649	0.0667237
252	2	0.130866	0.0987527	0.156557		-0.821034	0.185649	0.0667237
255	2	0.256092	0.298095	0.222489		1.05574	0.185649	0.0667237
257	2	0.153202	0.117606	0.181678		-0.486289	0.185649	0.0667237
101	3	0.0686952	0.0325932	0.0975768		-1.25767	0.187922	0.0948001
106	3	0.199488	0.193421	0.204342		0.122004	0.187922	0.0948001
107	3	0.440284	0.647286	0.274682		2.66204	0.187922	0.0948001
109	3	0.126038	0.0738611	0.16778		-0.652786	0.187922	0.0948001
156	3	0.158839	0.186362	0.13682		-0.306786	0.187922	0.0948001
204	3	0.184783	0.162706	0.202445		-0.0331132	0.187922	0.0948001
208	3	0.12779	0.0889254	0.158882		-0.634307	0.187922	0.0948001
209	3	0.127991	0.102508	0.148377		-0.632186	0.187922	0.0948001
211	3	0.119859	0.0807566	0.15114		-0.71797	0.187922	0.0948001
215	3	0.278798	0.309792	0.254003		0.958609	0.187922	0.0948001
217	3	0.0983379	0.0470741	0.139349		-0.944982	0.187922	0.0948001
218	3	0.141393	0.0570313	0.208882		-0.49082	0.187922	0.0948001
222	3	0.210575	0.147197	0.261278		0.238957	0.187922	0.0948001
223	3	0.18902	0.182676	0.194096		0.011583	0.187922	0.0948001
227	3	0.291283	0.0924205	0.450373		1.0903	0.187922	0.0948001
232	3	0.0997442	0.0590735	0.132281		-0.930148	0.187922	0.0948001
253	3	0.332133	0.0807566	0.533235		1.52121	0.187922	0.0948001
256	3	0.187549	0.0749726	0.27761		-0.00394032	0.187922	0.0948001

## Sheet: T2
Sujet	Groupe	MOY	Petits	Grands		Z-Score	MOYENNE	Ecart-type
102	1	0.194767	0.105291	0.266349		1.01118	0.148443	0.0458125
105	1	0.13046	0.110503	0.146425		-0.392529	0.148443	0.0458125
110	1	0.138158	0.137774	0.138465		-0.224495	0.148443	0.0458125
111	1	0.152894	0.176329	0.134145		0.097156	0.148443	0.0458125
152	1	0.252711	0.182429	0.308936		2.27598	0.148443	0.0458125
155	1	0.150396	0.12097	0.173936		0.0426389	0.148443	0.0458125
205	1	0.226249	0.138144	0.296732		1.69836	0.148443	0.0458125
206	1	0.0833455	0.0381853	0.119474		-1.42095	0.148443	0.0458125
207	1	0.111751	0.0577029	0.154989		-0.800913	0.148443	0.0458125
212	1	0.0868056	0.0551261	0.112149		-1.34542	0.148443	0.0458125
214	1	0.127406	0.0950795	0.153268		-0.459184	0.148443	0.0458125
216	1	0.103527	0.0902412	0.114156		-0.980421	0.148443	0.0458125
219	1	0.137202	0.0746848	0.187215		-0.245371	0.148443	0.0458125
224	1	0.136489	0.151055	0.124836		-0.260928	0.148443	0.0458125
226	1	0.124306	0.0786458	0.160833		-0.526865	0.148443	0.0458125
228	1	0.118884	0.134512	0.106382		-0.645207	0.148443	0.0458125
229	1	0.1697	0.151439	0.184309		0.464016	0.148443	0.0458125
230	1	0.163657	0.0974781	0.216601		0.332111	0.148443	0.0458125
254	1	0.211702	0.0933662	0.306371		1.38083	0.148443	0.0458125
103	2	0.071144	0.0515214	0.0868421		-1.58651	0.126842	0.0351073
104	2	0.110989	0.129112	0.0964912		-0.451551	0.126842	0.0351073
108	2	0.0807069	0.0738239	0.0862133		-1.31412	0.126842	0.0351073
151	2	0.138706	0.0396245	0.217971		0.337938	0.126842	0.0351073
153	2	0.188359	0.223314	0.160395		1.75225	0.126842	0.0351073
154	2	0.142538	0.171546	0.119331		0.447079	0.126842	0.0351073
201	2	0.162652	0.161486	0.163586		1.02002	0.126842	0.0351073
202	2	0.1167	0.0525297	0.168037		-0.288878	0.126842	0.0351073
203	2	0.153064	0.163829	0.144452		0.746911	0.126842	0.0351073
210	2	0.112043	0.0638432	0.150603		-0.421533	0.126842	0.0351073
213	2	0.094152	0.0337445	0.142478		-0.931144	0.126842	0.0351073
220	2	0.103673	0.0328673	0.160318		-0.659942	0.126842	0.0351073
221	2	0.105336	0.103769	0.10659		-0.612572	0.126842	0.0351073
225	2	0.173057	0.0772615	0.249693		1.31638	0.126842	0.0351073
231	2	0.170827	0.123328	0.208827		1.25288	0.126842	0.0351073
251	2	0.115314	0.0398026	0.175724		-0.328356	0.126842	0.0351073
252	2	0.16889	0.215652	0.13148		1.1977	0.126842	0.0351073
255	2	0.121625	0.146491	0.101732		-0.148595	0.126842	0.0351073
257	2	0.0802205	0.0808251	0.0797368		-1.32797	0.126842	0.0351073
101	3	0.12154	0.0498355	0.178904		-0.808648	0.179568	0.071759
106	3	0.176267	0.159059	0.190033		-0.0460028	0.179568	0.071759
107	3	0.177547	0.0964864	0.242396		-0.0281534	0.179568	0.071759
109	3	0.113548	0.0663651	0.151294		-0.920023	0.179568	0.071759
156	3	0.146059	0.0946546	0.187182		-0.466966	0.179568	0.071759
204	3	0.155933	0.0810855	0.215811		-0.329359	0.179568	0.071759
208	3	0.148288	0.0694764	0.211338		-0.435896	0.179568	0.071759
209	3	0.170846	0.105702	0.222961		-0.121549	0.179568	0.071759
211	3	0.12673	0.0855537	0.159671		-0.736322	0.179568	0.071759
215	3	0.34626	0.44227	0.269452		2.32294	0.179568	0.071759
217	3	0.236257	0.107223	0.339485		0.789999	0.179568	0.071759
218	3	0.106421	0.0633909	0.140844		-1.01934	0.179568	0.071759
222	3	0.226176	0.246669	0.209781		0.649506	0.179568	0.071759
223	3	0.077723	0.0415296	0.106678		-1.41926	0.179568	0.071759
227	3	0.265923	0.344476	0.203081		1.20341	0.179568	0.071759
232	3	0.181884	0.122163	0.22966		0.0322717	0.179568	0.071759
253	3	0.309064	0.158279	0.429693		1.8046	0.179568	0.071759
256	3	0.145754	0.0603893	0.214046		-0.47121	0.179568	0.071759
